# Supplementary material
Source: PubMed Central journal article supplement (PMC3581376)
Supplement: supp_M112.408245_jbc.M112.408245-1.pdf [file supp_M112.408245_jbc.M112.408245-1.pdf]

## Supplemental data

**Supplemental Table 1 The primer sequences used in the real-time PCR experiment**

|                | Primer pairs                                                       | Length of products | Efficiency |
|----------------|--------------------------------------------------------------------|--------------------|------------|
| SP1            | F: 5'-GCCGCTCCCAACTTACAGAA-3'<br>R: 5'-CCCATCAACGGTCTGGA-3'        | 102                | 102.3      |
| USF1           | F: 5'-TTGGATGAGTGACTGCTGACGC-3'<br>R: 5'-CATCTTGCGCAGGGCGTCTT-3'   | 115                | 101.2      |
| CREB1          | F: 5'-CCGGGCCGTGAACGAAAGCA-3'<br>R: 5'-TGGCAATCTGTGGCTGGGCT-3'     | 155                | 93.7       |
| CDX2           | F: 5'-CAGGACGAAAGACAAATATC-3'<br>R: 5'-GATGTAGCGACTGTAGTG-3'       | 85                 | 101.3      |
| MUC3A          | F: 5'-CCGGACCTCAATGACAACACT-3'<br>R: 5'-ACCACGATGCTGCCATTCCT-3'    | 146                | 100.6      |
| GAPDH          | F: 5'-GTAGAGGCAGGGATGATGTTCT-3'<br>R: 5'-CTTTGGTATCGTGGAAGGACTC-3' | 132                | 101        |
| $\beta$ -actin | F: 5'-GTGATCTCCTTCTGCATCCTGT-3'<br>R: 5'-CCACGAAACTACCTTCAACTCC-3' | 132                | 97.5       |

**Supplemental Table 2 The primer sequences used in the each MUC3 promoter fragment**

|         | Forward                                 | Reverse                           |
|---------|-----------------------------------------|-----------------------------------|
| MUC3-M5 | 5'-CCGCTCGAGAGTCTAGTCTCGAACCCCTGACCT-3' | 5'-CCCAAGCTTGGGCCAGCGGGCAGGGGG-3' |
| MUC3-M4 | 5'-CCGCTCGAGGCTCTTGGCTCACTGCACCCTCCA-3' | 5'-CCCAAGCTTGGGCCAGCGGGCAGGGGG-3' |
| MUC3-M3 | 5'-CCGCTCGAGGGAATACAGGCGTGAGCCACCGC-3'  | 5'-CCCAAGCTTGGGCCAGCGGGCAGGGGG-3' |
| MUC3-M2 | 5'-CCGCTCGAGCAGGCAGGCTGTGGGGCTGAGCC-3'  | 5'-CCCAAGCTTGGGCCAGCGGGCAGGGGG-3' |
| MUC3-M1 | 5'-CCGCTCGAGCTGACGCTCAGCAAACCGATA-3'    | 5'-CCCAAGCTTGGGCCAGCGGGCAGGGGG-3' |

**Supplemental Table 3 The primer sequences used in the ChIP experiment**

| ChIP                        | Primer pairs                                                                           | Length of products |
|-----------------------------|----------------------------------------------------------------------------------------|--------------------|
| ChIP1                       | Forward: 5'-CACTATGTTGGCCAGTCTAGTCTCGA-3'<br>Reverse: 5'-CAGCACATTGTTTGACCTATCCAGTT-3' | 156 bp             |
| ChIP2                       | Forward: 5'-GGGAATACAGGCCGTGAGCCAC-3'<br>Reverse: 5'-GCCAGAAAAAACCGTGGGAGTAAT-3'       | 163 bp             |
| ChIP3                       | Forward: 5'-CCTGGACTTGTCCCTATCTTTTCCC-3'<br>Reverse: 5'-TGCTGAGCGTCAGGGCTGAG-3'        | 144 bp             |
| ChIP4                       | Forward: 5'-CCTGGACTTGTCCCTATCTTTTCCC-3'<br>Reverse: 5'-TGCTGAGCGTCAGGGCTGAG-3'        | 144 bp             |
| Internal control<br>(GAPDH) | Forward: 5'-TACTAGCGGTTTTACGGGCG-3'<br>Reverse: 5'-TCGAACAGGAGGAGCAGAGAGCGA-3'         | 166 bp             |

**Supplemental Table 4 2.0 fold up-regulated transcription factors of TFLK-containing  
10-mer-BP treated HT-29-Gal cells versus untreated HT-29-Gal cells**

| Row | Column | Position | Transcription Factor    | Initial Values (untreated) | Initial Values (treated) | Standardised Values (untreated) | Standardised Values (treated) | Fold change (treated/untreated) |
|-----|--------|----------|-------------------------|----------------------------|--------------------------|---------------------------------|-------------------------------|---------------------------------|
| 1   | 1      | 1        | AP-1                    | 25702                      | 55423                    | 0.022268                        | 0.870609                      | 39.09653                        |
| 1   | 2      | 2        | GAS/ISRE                | 26113                      | 53329                    | 0.033957                        | 0.813418                      | 23.95448                        |
| 1   | 3      | 3        | Pbx1                    | 27200                      | 51980                    | 0.064871                        | 0.776575                      | 11.97113                        |
| 1   | 4      | 4        | Stat5/Stat6             | 31950                      | 59423                    | 0.199959                        | 0.979855                      | 4.900288                        |
| 1   | 22     | 22       | PREB                    | 29412                      | 46848                    | 0.127779                        | 0.636413                      | 4.980574                        |
| 1   | 23     | 23       | T3R                     | 26251                      | 35690                    | 0.037882                        | 0.331671                      | 8.755483                        |
| 2   | 1      | 24       | AP-2                    | 25238                      | 54253                    | 0.009072                        | 0.838654                      | 92.44199                        |
| 2   | 2      | 25       | GATA                    | 25794                      | 51871                    | 0.024885                        | 0.773598                      | 31.0874                         |
| 2   | 3      | 26       | Pit 1                   | 34002                      | 56814                    | 0.258317                        | 0.908599                      | 3.517385                        |
| 2   | 4      | 27       | TFIID                   | 28705                      | 40470                    | 0.107672                        | 0.46222                       | 4.292843                        |
| 2   | 5      | 28       | CREB                    | 26008                      | 34899                    | 0.030971                        | 0.310067                      | 10.01164                        |
| 2   | 23     | 46       | Tat                     | 29138                      | 37148                    | 0.119987                        | 0.371491                      | 3.096106                        |
| 3   | 4      | 50       | TR                      | 27374                      | 30830                    | 0.069819                        | 0.198937                      | 2.849319                        |
| 3   | 9      | 55       | RREB (1)                | 27712                      | 30762                    | 0.079432                        | 0.19708                       | 2.481122                        |
| 3   | 14     | 60       | Pur-1                   | 31330                      | 42970                    | 0.182326                        | 0.530499                      | 2.909615                        |
| 4   | 1      | 70       | Brn-3                   | 26090                      | 31425                    | 0.033303                        | 0.215187                      | 6.461551                        |
| 4   | 3      | 72       | PRE                     | 31922                      | 48252                    | 0.199162                        | 0.674758                      | 3.38798                         |
| 4   | 4      | 73       | TR(DR-4)                | 33670                      | 60404                    | 0.248875                        | 1.006647                      | 4.044796                        |
| 4   | 5      | 74       | CETP-CRE                | 32859                      | 49675                    | 0.22581                         | 0.713622                      | 3.160275                        |
| 4   | 16     | 85       | ATF-adelta              | 29984                      |                          | 0.144046                        | 0.58067                       | 4.03113                         |
| 4   | 20     | 89       | myc-CF1                 | 29592                      | 37199                    | 0.132898                        | 0.372884                      | 2.805788                        |
| 5   | 1      | 93       | C/EBP                   | 27132                      | 36591                    | 0.062937                        | 0.356278                      | 5.660897                        |
| 5   | 4      | 96       | USF-1                   | 26400                      | 54524                    | 0.042119                        | 0.846056                      | 20.08727                        |
| 5   | 7      | 99       | HNF-3 b                 | 26038                      | 26617                    | 0.031824                        | 0.083874                      | 2.635556                        |
| 5   | 8      | 100      | Nkx-2.5                 | 35079                      | 49528                    | 0.288946                        | 0.709607                      | 2.455848                        |
| 5   | 10     | 102      | ATF2                    | 26747                      | 27527                    | 0.051988                        | 0.108727                      | 2.091407                        |
| 5   | 19     | 111      | LF-A2                   | 27254                      | 36897                    | 0.066406                        | 0.364636                      | 5.490975                        |
| 5   | 21     | 113      | p53(2)                  | 29655                      | 54769                    | 0.13469                         | 0.852747                      | 6.331192                        |
| 6   | 4      | 119      | VDR(DR-3)               | 29352                      | 58836                    | 0.126073                        | 0.963823                      | 7.644983                        |
| 6   | 13     | 128      | MZF1(2)                 | 36146                      | 54578                    | 0.319291                        | 0.84753                       | 2.654414                        |
| 6   | 16     | 131      | beta M-globin factor B1 | 30443                      | 36723                    | 0.1571                          | 0.359884                      | 2.290791                        |
| 7   | 4      | 142      | HSE                     | 33579                      | 57538                    | 0.246287                        | 0.928372                      | 3.76948                         |
| 7   | 9      | 147      | SRY                     | 27890                      | 34142                    | 0.084494                        | 0.289393                      | 3.42501                         |
| 7   | 14     | 152      | RIPE3a1                 | 26934                      | 53233                    | 0.057306                        | 0.810796                      | 14.14861                        |
| 7   | 20     | 158      | NF-1(2)                 | 30252                      | 53018                    | 0.151668                        | 0.804924                      | 5.307141                        |

|           |           |            |                   |              |              |                 |                 |                 |
|-----------|-----------|------------|-------------------|--------------|--------------|-----------------|-----------------|-----------------|
| 7         | 22        | 160        | RORE              | 29546        | 34744        | 0.13159         | 0.305834        | 2.324147        |
| 8         | 1         | 162        | c-Myb             | 33771        | 55087        | 0.251747        | 0.861432        | 3.421816        |
| 8         | 3         | 164        | Smad SBE          | 32341        | 42251        | 0.211078        | 0.510862        | 2.420245        |
| 8         | 21        | 182        | Pax5(2)           | 31014        | 55107        | 0.173339        | 0.861978        | 4.972784        |
| 9         | 7         | 191        | IRF-1, IRF-2      | 30666        | 57283        | 0.163442        | 0.921408        | 5.637517        |
| 9         | 16        | 200        | C/EBPalph(1)      | 28690        | 33494        | 0.107246        | 0.271695        | 2.533389        |
| 9         | 18        | 202        | HiNF-A            | 31903        | 41500        | 0.198622        | 0.490351        | 2.468764        |
| 9         | 19        | 203        | LXRE1             | 27402        | 33704        | 0.070615        | 0.27743         | 3.928747        |
| 10        | 7         | 214        | ISRE (1)          | 35238        | 59008        | 0.293468        | 0.96852         | 3.30026         |
| 11        | 6         | 236        | GATA-4            | 31954        | 49561        | 0.200072        | 0.710509        | 3.551259        |
| <b>11</b> | <b>10</b> | <b>240</b> | <b>Cdx2</b>       | <b>39728</b> | <b>59986</b> | <b>0.421162</b> | <b>0.995231</b> | <b>2.363063</b> |
| 11        | 12        | 242        | LyF               | 26935        | 28115        | 0.057334        | 0.124786        | 2.176473        |
| 11        | 17        | 247        | EBP-80            | 38720        | 52829        | 0.392494        | 0.799763        | 2.037641        |
| 11        | 18        | 248        | HiNF-D3           | 39445        | 57936        | 0.413113        | 0.939242        | 2.273572        |
| 11        | 21        | 251        | PCF               | 27843        | 42434        | 0.083157        | 0.51586         | 6.20342         |
| 11        | 22        | 252        | SRF(2)            | 28223        | 34590        | 0.093964        | 0.301628        | 3.210029        |
| 12        | 8         | 261        | Pax3              | 25374        | 36564        | 0.01294         | 0.355541        | 27.47612        |
| 12        | 15        | 268        | ABF-1             | 39818        | 56032        | 0.423721        | 0.887241        | 2.093928        |
| 12        | 16        | 269        | CBFB              | 27720        | 31198        | 0.079659        | 0.208988        | 2.62352         |
| 12        | 18        | 271        | HNF1a/b/c         | 33091        | 48327        | 0.232408        | 0.676806        | 2.912145        |
| 12        | 19        | 272        | MDBP(1)           | 31609        | 45075        | 0.190261        | 0.587989        | 3.09044         |
| 12        | 22        | 275        | SSAP              | 36876        | 50597        | 0.340052        | 0.738803        | 2.172619        |
| 13        | 2         | 278        | oct-1             | 26413        | 27350        | 0.042489        | 0.103893        | 2.445189        |
| 13        | 9         | 285        | AF1, ARP1., NF-BA | 28346        | 54147        | 0.097462        | 0.835759        | 8.575197        |
| 13        | 10        | 286        | CPI, CTF, CBTF    | 26302        | 29549        | 0.039332        | 0.163951        | 4.168394        |
| 13        | 12        | 288        | LyF-1             | 32159        | 55728        | 0.205902        | 0.878939        | 4.268714        |
| 13        | 13        | 289        | p55               | 25819        | 25899        | 0.025596        | 0.064264        | 2.510741        |
| 13        | 14        | 290        | TCE               | 28502        | 49701        | 0.101899        | 0.714332        | 7.010201        |
| 13        | 15        | 291        | ACF               | 29081        | 38103        | 0.118365        | 0.397573        | 3.358864        |
| 13        | 18        | 294        | HNF-4alpha2 /1    | 30428        | 49831        | 0.156674        | 0.717883        | 4.582028        |
| 13        | 20        | 296        | NF-E2(2)          | 39205        | 54834        | 0.406288        | 0.854522        | 2.103244        |
| <b>13</b> | <b>22</b> | <b>298</b> | <b>Sp1</b>        | <b>26449</b> | <b>46243</b> | <b>0.043513</b> | <b>0.619889</b> | <b>14.24622</b> |
| 14        | 1         | 300        | Ets-1/PEA3        | 28701        | 34079        | 0.107558        | 0.287672        | 2.674565        |
| 14        | 16        | 315        | c-Ets-1           | 28263        | 30758        | 0.095102        | 0.196971        | 2.071152        |
| 14        | 18        | 317        | HOXA4             | 27212        | 36973        | 0.065212        | 0.366711        | 5.623381        |
| 14        | 19        | 318        | MEF-2a            | 25800        | 26785        | 0.025055        | 0.088462        | 3.530674        |
| 14        | 20        | 319        | NFE-6/CP1         | 33680        | 55565        | 0.249159        | 0.874487        | 3.509754        |
| 14        | 21        | 320        | PRDI-BFc          | 26334        | 43296        | 0.040242        | 0.539402        | 13.40396        |
| 14        | 22        | 321        | Stat5b            | 25681        | 27974        | 0.021671        | 0.120935        | 5.580527        |

|    |    |     |            |       |       |          |          |          |
|----|----|-----|------------|-------|-------|----------|----------|----------|
| 15 | 15 | 337 | ALF1B      | 35429 | 48977 | 0.2989   | 0.694559 | 2.323717 |
| 15 | 17 | 339 | EIL1/2/3   | 26017 | 28142 | 0.031227 | 0.125524 | 4.019761 |
| 15 | 18 | 340 | IL-6 RE-BP | 31199 | 46753 | 0.1786   | 0.633818 | 3.548803 |
| 15 | 19 | 341 | Mfh-1      | 26332 | 34127 | 0.040185 | 0.288983 | 7.191295 |
| 15 | 20 | 342 | NFkB       | 28515 | 58385 | 0.102269 | 0.951505 | 9.303976 |
| 15 | 21 | 343 | PRDII-BF1  | 26107 | 46037 | 0.033786 | 0.614263 | 18.18088 |
| 15 | 23 | 345 | YB1        | 29022 | 53182 | 0.116688 | 0.809404 | 6.936504 |

**Supplemental Table 5 2.0 fold down-regulated transcription factors of TFLK-containing  
10-mer-BP treated HT-29-Gal cells versus untreated HT-29-Gal cells**

| Row | Column | Position | Transcription Factor | Initial Values (untreated) | Initial Values (treated) | Standardised Values (untreated) | Standardised Values (treated) | Fold change (treated/untreated) |
|-----|--------|----------|----------------------|----------------------------|--------------------------|---------------------------------|-------------------------------|---------------------------------|
| 1   | 11     | 11       | CSBP                 | 27730                      | 24887                    | 0.0799436                       | 0.0366247                     | 0.4581319                       |
| 1   | 14     | 14       | PPUR(1)              | 56963                      | 25920                    | 0.9113174                       | 0.0648375                     | 0.071147                        |
| 1   | 15     | 15       | TGT3                 | 51055                      | 27686                    | 0.7432965                       | 0.1130696                     | 0.1521191                       |
| 1   | 19     | 19       | ISGF                 | 54232                      | 29895                    | 0.833649                        | 0.1734007                     | 0.2080021                       |
| 2   | 18     | 41       | Fra-1/JUN            | 30296                      | 25019                    | 0.1529195                       | 0.0402298                     | 0.2630785                       |
| 3   | 18     | 64       | GATA1(2)             | 30745                      | 26177                    | 0.1656889                       | 0.0718566                     | 0.4336835                       |
| 3   | 22     | 68       | PTF1                 | 38241                      | 28263                    | 0.3788719                       | 0.1288283                     | 0.3400314                       |
| 4   | 12     | 81       | ICSBP                | 28333                      | 24631                    | 0.0970927                       | 0.029633                      | 0.305203                        |
| 7   | 11     | 149      | Elf-1                | 27750                      | 24098                    | 0.0805124                       | 0.0150759                     | 0.18725                         |
| 9   | 10     | 194      | CD28RC               | 27350                      | 24224                    | 0.0691366                       | 0.0185172                     | 0.267835                        |
| 10  | 17     | 224      | E2                   | 27520                      | 24812                    | 0.0739713                       | 0.0345764                     | 0.4674293                       |
| 12  | 23     | 276      | v-rel 50-55K         | 27042                      | 24583                    | 0.0603772                       | 0.028322                      | 0.4690848                       |
